# Supplementary material for: Proximate composition determination in goat cheese whey by near infrared spectroscopy (NIRS)
Source: PeerJ. 2020 Feb 12;8:e8619. doi: 10.7717/peerj.8619 (PMC7023836; doi:10.7717/peerj.8619)
Supplement: Supplemental Information 1 [file peerj-08-8619-s001.xlsx]

## Sheet: COMPOSITION
SAMPLES	BATCHES	REPLICATE	WEIGHT CRUCIBLE FOR SOLIDS	WET WEIGHT SAMPLE SOLIDS	WEIGHT CRUCIBLE+ DRY SAMPLE	SOLIDS VACUUM 70oC (%)	MOISTURE VACUUM 70oC (%)	WEIGHT CRUCIBLE FOR ASH	WET SAMPLE ASH	WEIGHT CRUCIBLE + ASH	WEIGHT DE ASH	ASH (%)	FAT(%)	WET WEIGHT SAMPLE	VOL HCL	N (%)	PROTEIN (%)	CARBOHYDRATE BY DIFFERENCE
1	1	1	38.0664	2.0162	38.1948	6.36842	93.6316	24.3923	2.0531	24.4105	0.0182	0.886464	0.5	0.2433	2.51667	0.158427	1.01076	3.97119
	1	2	19.4941	2.0263	19.6285	6.63278	93.3672	26.6997	2.0418	26.7173	0.0176	0.861985	0.5	0.2354	2.76667	0.18001	1.14846	4.12233
	1	3	23.3513	2.0232	23.4826	6.48972	93.5103	25.1528	2.0505	25.1693	0.0165	0.804682	0.5	0.2215	2.66667	0.184391	1.17642	4.00862
2	2	1	32.3874	2.0871	32.5177	6.24311	93.7569	34.7834	2.043	34.8033	0.0199	0.974058	0.2	0.22	1.66667	0.11603	0.740273	4.32878
	2	2	36.2987	2.0135	36.4283	6.43655	93.5634	26.1767	2.0448	26.1938	0.0171	0.836268	0.2	0.2327	1.96667	0.129443	0.825849	4.57444
	2	3	34.7645	2.0028	34.8996	6.74556	93.2544	29.594	2.0533	29.613	0.019	0.92534	0.2	0.2196	2.16667	0.151114	0.964108	4.65611
3	3	1	23.6387	2.0266	23.7774	6.84398	93.156	23.0999	2.0407	23.1175	0.0176	0.862449	0.6	0.2021	2.66667	0.202091	1.28934	4.09218
	3	2	25.132	2.0037	25.2716	6.96711	93.0329	35.4504	2.0565	35.4687	0.0183	0.889861	0.5	0.2877	2.96667	0.157933	1.00762	4.56963
	3	3	23.08	2.0125	23.2155	6.73292	93.2671	25.3552	2.0397	25.3722	0.017	0.833456	0.5	0.2064	2.56667	0.190461	1.21514	4.18432
4	4	1	35.4254	2.0056	35.5684	7.13004	92.87	19.5119	2.0346	19.5213	0.0094	0.462007	0.55	0.2232	2.66667	0.182987	1.16746	4.95057
	4	2	32.6856	2.0032	32.8347	7.44309	92.5569	23.3839	2.0369	23.3935	0.0096	0.471304	0.55	0.2088	2.36667	0.173601	1.10757	5.31421
	4	3	35.4272	2.0289	35.5597	6.53063	93.4694	25.4248	2.0272	25.4328	0.008	0.394633	0.6	0.2174	2.76667	0.194914	1.24355	4.29245
5	5	1	34.7671	2.0284	34.901	6.60126	93.3987	32.7376	2.0218	32.7413	0.0037	0.183005	0.6	0.221	2.21667	0.153622	0.980108	4.83815
	5	2	32.6993	2.002	32.838	6.92807	93.0719	36.332	2.0325	36.3397	0.0077	0.378844	0.6	0.2506	2.66667	0.16298	1.03981	4.90942
	5	3	23.0855	2.0536	23.2287	6.97312	93.0269	23.6592	2.0292	23.6661	0.0069	0.340035	0.5	0.2192	2.66667	0.186326	1.18876	4.94432
6	6	1	35.4299	2.0204	35.5754	7.20154	92.7985	34.9182	2.0173	34.9381	0.0199	0.986467	0.5	0.2239	2.56667	0.175574	1.12016	4.59491
	6	2	23.6391	2.0359	23.7795	6.89621	93.1038	24.9034	2.0464	24.9213	0.0179	0.874707	0.4	0.2385	3.06667	0.196935	1.25645	4.36506
	6	3	25.1312	2.0025	25.2754	7.201	92.799	32.4114	2.0501	32.4294	0.018	0.878006	0.5	0.2318	2.76667	0.182805	1.1663	4.6567
7	7	1	38.052	2.0491	38.1915	6.80787	93.1921	23.3811	1.6643	23.3937	0.0126	0.757075	0.3	0.2239	2.86667	0.196096	1.25109	4.4997
	7	2	36.2946	2.0383	36.4483	7.5406	92.4594	26.7026	2.1799	26.7172	0.0146	0.669755	0.3	0.2202	2.96667	0.206346	1.31649	5.25435
	7	3	23.3599	2.1005	23.5088	7.08879	92.9112	23.6581	2.0054	23.6707	0.0126	0.628304	0.3	0.2345	2.76667	0.1807	1.15287	5.00762
8	8	1	34.8914	2.0031	35.0395	7.39354	92.6065	25.1575	1.8782	25.1698	0.0123	0.654882	0.9	0.2335	3.36667	0.22083	1.4089	4.42976
	8	2	32.388	2.0342	32.5365	7.30017	92.6998	19.5135	1.9149	19.5264	0.0129	0.673664	0.8	0.2677	2.76667	0.15829	1.00989	4.81661
	8	3	19.4973	2.057	19.6441	7.13661	92.8634	24.9081	1.9258	24.9197	0.0116	0.602347	0.8	0.2342	2.86667	0.187472	1.19607	4.53819
9	9	1	40.2152	2.029	40.351	6.69295	93.307	23.1034	1.9179	23.1155	0.0121	0.630898	0.55	0.2205	1.96667	0.136605	0.871542	4.64051
	9	2	39.7266	2.0215	39.8665	6.9206	93.0794	26.1817	1.9181	26.1939	0.0122	0.636046	0.55	0.2221	2.16667	0.149413	0.953256	4.7813
	9	3	31.0908	2.0084	31.2277	6.81637	93.1836	29.6004	1.9153	29.6096	0.0092	0.480343	0.55	0.2318	2.06667	0.136553	0.87121	4.91482
10	10	1	32.3809	2.034	32.5058	6.14061	93.8594	32.416	1.9095	32.4274	0.0114	0.597015	0.4	0.2326	2.96667	0.195346	1.24631	3.89729
	10	2						24.3952	1.8992	24.407	0.0118	0.621314	0.4	0.2338	2.46667	0.161589	1.03094
	10	3	23.0791	2.0071	23.2246	7.24927	92.7507	25.3602	1.9569	25.3701	0.0099	0.505902	0.45	0.2336	2.46667	0.161727	1.03182	5.26154
11	11	1	34.7598	2.0165	34.9047	7.18572	92.8143	34.7868	1.9452	34.8033	0.0165	0.848242	0.5	0.2446	2.96667	0.185762	1.18516	4.65231
	11	2	38.0488	2.0095	38.1832	6.68823	93.3118	35.4584	1.9256	35.4684	0.01	0.519319	0.5	0.2486	3.16667	0.195095	1.24471	4.4242
	11	3	19.4945	2.0258	19.6452	7.43904	92.561	34.9223	1.9312	34.9377	0.0154	0.797432	0.5	0.231	2.36667	0.156917	1.00113	5.14047
12	12	1	31.0928	2.0166	31.2226	6.43658	93.5634	36.3308	1.9524	36.343	0.0122	0.624872	0.5	0.2094	2.46667	0.180418	1.15106	4.16064
	12	2	23.3586	2.049	23.5006	6.93021	93.0698	32.7293	1.8509	32.7411	0.0118	0.637528	0.5	0.222	2.16667	0.14948	0.953685	4.839
	12	3	23.6439	2.0344	23.7792	6.65061	93.3494	17.3249	1.7355	17.3351	0.0102	0.587727	0.5	0.2219	2.46667	0.170254	1.08622	4.47666
13	13	1	32.7011	2.0275	32.8172	5.72626	94.2737	17.6104	1.9038	17.6215	0.0111	0.583044	0.5	0.2231	2.86667	0.196799	1.25558	3.38764
	13	2	25.1336	2.0562	25.2671	6.49256	93.5074	14.2397	1.9128	14.2524	0.0127	0.663948	0.5	0.218	2.56667	0.180326	1.15048	4.17813
	13	3	34.8934	2.0265	35.0213	6.31137	93.6886	13.8416	1.9165	13.8523	0.0107	0.558309	0.5	0.2275	2.76667	0.186261	1.18834	4.06472
14	14	1	19.5047	1.8872	19.6446	7.4131	92.5869	23.889	2.0146	23.9005	0.0115	0.570833	0.5	0.2027	3.1	0.197409	1.25947	5.0828
	14	1'	27.1813	1.884	27.3088	6.76752	93.2325	27.1639	2.0142	27.1742	0.0103	0.511369
15	15	2	21.4376	1.9041	21.5569	6.26543	93.7346	27.9873	1.9941	27.9984	0.0111	0.556642	0.4	0.2028	3.5	0.222771	1.42128	3.8875
	15	2'	26.9698	1.8765	27.079	5.81934	94.1807	23.4269	1.9893	23.4378	0.0109	0.547931
16	16	3	23.9699	1.8773	24.0513	4.33601	95.664	23.7919	1.9772	23.7982	0.0063	0.318632	0.5	0.2242	2.8	0.161206	1.02849	2.48889
	16	3'	24.6015	1.8323	24.6723	3.864	96.136	21.5437	1.9852	21.5503	0.0066	0.33246
17	17	4	17.3159	1.9118	17.4403	6.50696	93.493	27.2386	2.0071	27.249	0.0104	0.518161	0.3	0.2182	3.3	0.195217	1.24549	4.44331
	17	4'	14.2351	1.8956	14.358	6.48344	93.5166	24.271	2	24.2825	0.0115	0.575
18	18	5	27.8548	1.8908	27.9832	6.79078	93.2092	27.0963	2.0147	27.1067	0.0104	0.516206	0.8	0.1933	3.5	0.23372	1.49113	3.98344
	18	5'	26.1129	1.8883	26.2509	7.30816	92.6918	20.2095	1.925	20.2201	0.0106	0.550649
19	19	6	13.8363	1.882	13.9431	5.67481	94.3252	23.3023	2.0094	23.3156	0.0133	0.661889	0.2	0.2116	2.6	0.158605	1.0119	3.80103
	19	6'	17.6013	1.8842	17.7087	5.70003	94.3	23.349	1.9313	23.3615	0.0125	0.647232
20	20	7	26.1271	1.9998	26.2438	5.83558	94.1644	23.8916	2.021	23.9052	0.0136	0.672934	0.3	0.214	3.1	0.186985	1.19296	3.66968
	20	7'	21.4375	1.9798	21.5574	6.05617	93.9438	27.2411	2.013	27.2552	0.0141	0.700447
21	21	8	27.184	1.9792	27.3132	6.52789	93.4721	27.99	2.0451	28.0049	0.0149	0.728571	0.5	0.2024	3	0.191324	1.22065	4.07867
	21	8'	26.9619	1.9886	27.0971	6.79875	93.2012	23.307	2.0134	23.3212	0.0142	0.705275
22	22	9	23.9781	1.989	24.1034	6.29965	93.7004	27.2033	2.0142	27.2165	0.0132	0.655347	0.5	0.2088	4	0.24728	1.57764	3.56666
	22	9'	17.6033	1.9776	17.727	6.25506	93.7449	19.5377	1.8976	19.5502	0.0125	0.658727
23	23	10	27.8563	1.9877	27.953	4.86492	95.1351	23.3528	2.0099	23.3621	0.0093	0.46271	0.4	0.2178	2.9	0.17187	1.09653	2.90568
	23	10'	17.3205	1.9823	17.4138	4.70665	95.2933	23.7942	2.0074	23.807	0.0128	0.637641
24	24	11	24.5986	2.0034	24.7176	5.9399	94.0601	23.7942	2.0074	23.807	0.0128	0.637641	0.2	0.203	3.9	0.247986	1.58215	3.52011
	24	11'	19.5225	1.9905	19.6349	5.64682	94.3532	21.547	2.0134	21.5597	0.0127	0.630774
25	1 AND2	12	13.8381	1.9857	13.9566	5.96767	94.0323	27.1011	2.0202	27.1157	0.0146	0.722701	0.2	0.207	3	0.187072	1.19352	3.85145
	1 AND2	12'	14.2344	1.9794	14.3585	6.26958	93.7304	24.2732	1.9787	24.2867	0.0135	0.682266
26	1AND3	13	27.973	1.8868	28.0964	6.54017	93.4598	36.3379	1.998	36.3505	0.0126	0.630631	0.4	0.1953	3.1	0.204889	1.30719	4.20235
	1AND3	13'	23.2897	1.873	23.399	5.83556	94.1644	36.4102	2.0012	36.4231	0.0129	0.644613
27	3AND3	14	20.1937	1.8784	20.3228	6.87287	93.1271	26.5588	2.0191	26.5715	0.0127	0.628993	0.5	0.207	3.5	0.218251	1.39244	4.35143
	3AND3	14'	23.324	1.867	23.4605	7.31119	92.6888	26.245	2.0114	26.2577	0.0127	0.631401
28	4AND5	15	23.7705	1.8876	23.9062	7.18902	92.811	38.0506	1.9866	38.0611	0.0105	0.528541	0.6	0.2139	3.2	0.193107	1.23202	4.82846
	4AND5	15'	21.5273	1.8739	21.6639	7.28961	92.7104	26.2692	2.0037	26.2813	0.0121	0.603883
29	5AND6	16	27.086	1.8948	27.2062	6.34368	93.6563	26.2212	2.0094	26.2332	0.012	0.597193	0.5	0.2029	3.7	0.235385	1.50176	3.74473
	5AND6	16'	24.2503	1.8625	24.3727	6.57181	93.4282	26.2681	1.9899	26.2803	0.0122	0.613096
30	6AND7	17	23.8671	1.8751	23.9998	7.07696	92.923	23.5607	1.9997	23.5725	0.0118	0.590089	0.3	0.1989	1.12	0.0726846	0.463728	5.72314
	6AND7	17'	27.2144	1.8575	27.344	6.97712	93.0229	24.9542	1.9848	24.9661	0.0119	0.599557
31	7AND8	18	23.4127	1.8864	23.5415	6.82782	93.1722	25.3404	1.9918	25.3524	0.012	0.60247	0.5	0.196	3.4	0.223914	1.42857	4.29678
	7AND8	18'	27.1393	1.8498	27.275	7.33593	92.6641	24.9398	2.012	24.9521	0.0123	0.611332
32	8AND9	19	27.969	2.0089	28.0929	6.16755	93.8324	23.4308	2.0026	23.444	0.0132	0.659143	0.5	0.2148	3.5	0.210326	1.34188	3.66653
	8AND9	19'	27.2232	1.9955	27.3565	6.68003	93.32	27.1668	2.0086	27.1806	0.0138	0.687046
33	9AND10	20	23.2881	1.9848	23.4092	6.10137	93.8986	23.9943	1.9857	24.0071	0.0128	0.644609	0.5	0.2182	3.3	0.195217	1.24549	3.71128
	9AND10	20'	27.0735	1.9623	27.1929	6.0847	93.9153	24.6228	2.219	24.6357	0.0129	0.581343
34	10 AND11	21	26.1204	2.0394	26.2452	6.11945	93.8806	17.3316	1.9945	17.3423	0.0107	0.536475	0.4	0.2097	3.7	0.227752	1.45306	3.72991
	10 AND11	21'	21.4319	2.0295	21.5611	6.3661	93.6339	14.2472	1.9822	14.2589	0.0117	0.590253
35	11AND12	22	27.1782	2.0186	27.319	6.97513	93.0249	27.8767	1.97	27.8897	0.013	0.659898	0.4	0.2143	3.4	0.204793	1.30658	4.60865
	11AND12	22'	26.9595	2.027	27.0945	6.66009	93.3399	26.1402	1.9813	26.1536	0.0134	0.676324
36	13AND14	23	23.974	1.9871	24.1145	7.07061	92.9294	27.0955	2.0147	27.1033	0.0078	0.387154	0.6	0.2106	3.2	0.196133	1.25133	4.83212
	13AND14	23'	17.6016	2.0014	17.7406	6.94514	93.0549	23.3489	2.0076	23.355	0.0061	0.303845
37	15AND16	24	27.8562	1.984	27.9564	5.0504	94.9496	13.8484	1.9853	13.8589	0.0105	0.528887	0.4	0.201	2.8	0.179813	1.14721	2.97431
	15AND16	24'	17.3152	1.9338	17.4132	5.06774	94.9323	17.6153	1.9268	17.6255	0.0102	0.529375
38	17AND18	25	24.6006	1.998	24.7374	6.84685	93.1532	24.6183	2.0088	24.6335	0.0152	0.756671	0.5	0.2064	3.4	0.212632	1.35659	4.23359
	17AND18	25'	19.5198	2.0014	19.6641	7.20995	92.79	26.1386	2.0253	26.152	0.0134	0.66163
39	19 AND 20	26	20.1952	2.0368	20.3236	6.30401	93.696	27.2011	2.0036	27.2158	0.0147	0.733679	0.3	0.201	2.8	0.179813	1.14721	4.12312
	19 AND 20	26'	23.7754	2.016	23.9051	6.43353	93.5665	21.4485	1.9958	21.4615	0.013	0.651368
40	21AND22	27	27.9729	1.993	28.1033	6.5429	93.4571	19.536	1.9931	19.5488	0.0128	0.642216	0.5	0.2181	4	0.236735	1.51037	3.89031
	21AND22	27'	27.2262	1.947	27.3466	6.18387	93.8161	23.993	1.9667	24.0045	0.0115	0.584736
41	23AND24	28	23.2835	1.997	23.4065	6.15924	93.8408	14.2476	1.9904	14.2579	0.0103	0.517484	0.4	0.2047	2.7	0.170257	1.08624	4.15552
	23AND24	28'	27.0818	1.9949	27.2031	6.08051	93.9195	13.8468	1.9953	13.8577	0.0109	0.546284
											0

## Sheet: MEAN
	SAMPLES	1	2	3	4	5	6	7	8	9	10	11	12	13	14	15	16	17	18	19	20	21	22	23	24	25	26	27	28	29	30	31	32	33	34	35	36	37	38	39	40	41
	MOISTURE	6.49697	6.47507	6.848	7.03459	6.83415	7.09959	7.14575	7.27677	6.80998	6.69494	7.10433	6.67247	6.54397	7.09031	6.04239	4.10001	6.4952	7.04947	5.68742	5.94588	6.66332	6.27735	4.78579	5.79336	6.11862	6.18787	7.09203	7.23932	6.45774	7.02704	7.08187	6.42379	6.09303	6.24277	6.81761	7.00787	5.05907	7.0284	6.36877	6.36339	6.11987
	TOTAL SOLIDS	93.503	93.5249	93.152	92.9654	93.1658	92.9004	92.8542	92.7232	93.19	93.3051	92.8957	93.3275	93.8233	92.9097	93.9576	95.9	93.5048	92.9505	94.3126	94.0541	93.3367	93.7226	95.2142	94.2066	93.8814	93.8121	92.908	92.7607	93.5423	92.973	92.9181	93.5762	93.907	93.7572	93.1824	92.9921	94.9409	92.9716	93.6312	93.6366	93.8801
	ASH	0.851044	0.911888	0.861922	0.442648	0.300628	0.836596	0.685045	0.643631	0.582429	0.574744	0.721664	0.616709	0.601767	0.541101	0.552287	0.325546	0.54658	0.533428	0.654561	0.686691	0.716923	0.657037	0.550175	0.634207	0.702483	0.637622	0.630197	0.566212	0.605145	0.594823	0.606901	0.673094	0.612976	0.563364	0.668111	0.3455	0.529131	0.709151	0.692524	0.613476	0.531884
	FAT	0.5	0.2	0.566667	0.533333	0.566667	0.466667	0.3	0.833333	0.55	0.416667	0.5	0.5	0.5	0.5	0.4	0.5	0.3	0.8	0.2	0.3	0.5	0.5	0.4	0.2	0.2	0.4	0.5	0.6	0.5	0.3	0.5	0.5	0.5	0.4	0.4	0.6	0.4	0.5	0.3	0.5	0.4
	PROTEIN	1.11188	0.84341	1.1707	1.17286	1.06956	1.18097	1.24015	1.20495	0.898669	1.10302	1.14367	1.06366	1.19813	1.25947	1.42128	1.02849	1.24549	1.49113	1.0119	1.19296	1.22065	1.57764	1.09653	1.58215	1.19352	1.30719	1.39244	1.23202	1.50176	0.463728	1.42857	1.34188	1.24549	1.45306	1.30658	1.25133	1.14721	1.35659	1.14721	1.51037	1.08624
	CARBOHYDRATE BY DIFFERENCE	4.03405	4.51978	4.24871	4.88574	4.8973	4.61535	4.92056	4.59485	4.77888	4.60051	4.739	4.4921	4.24407	4.78974	3.66882	2.24596	4.40313	4.22491	3.82096	3.76622	4.22575	3.54267	2.73908	3.377	4.02262	3.84305	4.56939	4.84108	3.85084	5.66849	4.5464	3.90882	3.73457	3.82635	4.44292	4.81104	2.98273	4.46266	4.22904	3.73954	4.10175
SAMPLES	MOISTURE	TOTAL SOLIDS	ASH	FAT	PROTEIN	CARBOHYDRATE BY DIFFERENCE	1800	1799	1798	1797	1796	1795	1794	1793	1792	1791	1790	1789	1788	1787	1786	1785	1784	1783	1782	1781	1780	1779	1778	1777	1776	1775	1774	1773	1772	1771	1770	1769	1768	1767	1766	1765	1764	1763	1762	1761	1760	1759	1758
1	6.49697	93.503	0.851044	0.5	1.11188	4.03405	0.0022	0.0022	0.0025	0.0024	0.0021	0.0024	0.002	0.0022	0.0025	0.0022	0.0023	0.0021	0.0021	0.0023	0.0024	0.0022	0.0023	0.0028	0.0027	0.0028	0.0029	0.0029	0.0032	0.003	0.0035	0.0038	0.0039	0.0041	0.0044	0.0044	0.0048	0.0053	0.0056	0.0059	0.0063	0.007	0.0072	0.0075	0.0081	0.0085	0.0093	0.0095	0.0103
2	6.47507	93.5249	0.911888	0.2	0.84341	4.51978	0.0016	0.0019	0.0018	0.0019	0.0017	0.0019	0.0016	0.0018	0.0017	0.0023	0.0025	0.0029	0.0029	0.0029	0.0032	0.003	0.0033	0.0037	0.0036	0.0035	0.0036	0.0035	0.004	0.004	0.0044	0.0045	0.0048	0.0046	0.005	0.0052	0.0053	0.0059	0.0062	0.0065	0.0068	0.0072	0.0073	0.0079	0.0082	0.0087	0.0094	0.0099	0.0104
3	6.848	93.152	0.861922	0.566667	1.1707	4.24871	0.0014	0.0014	0.0016	0.0016	0.0013	0.0015	0.0012	0.0013	0.0014	0.0017	0.0013	0.0013	0.0016	0.0017	0.0018	0.0019	0.002	0.0024	0.0023	0.002	0.0023	0.0022	0.0028	0.0025	0.0031	0.0031	0.0035	0.0035	0.0038	0.0039	0.0041	0.0045	0.0049	0.0054	0.0057	0.006	0.0061	0.0067	0.0071	0.0073	0.008	0.0086	0.0091
4	7.03459	92.9654	0.442648	0.533333	1.17286	4.88574	0.0017	0.0019	0.002	0.0022	0.002	0.0021	0.0016	0.0022	0.0022	0.002	0.002	0.0023	0.002	0.0025	0.0026	0.0022	0.0027	0.003	0.003	0.0028	0.0029	0.0029	0.0032	0.0033	0.0036	0.0036	0.0039	0.0041	0.0042	0.0043	0.0048	0.0052	0.0051	0.0055	0.006	0.0066	0.0068	0.0072	0.0075	0.0079	0.0085	0.0091	0.0095
5	6.83415	93.1658	0.300628	0.566667	1.06956	4.8973	0.0015	0.0015	0.0018	0.0018	0.0013	0.0015	0.0013	0.0012	0.0015	0.0018	0.0016	0.0017	0.0016	0.0016	0.002	0.0019	0.0021	0.0021	0.0023	0.0023	0.0024	0.0023	0.0027	0.0028	0.003	0.003	0.0032	0.0035	0.0036	0.0036	0.0044	0.0046	0.0049	0.0052	0.0054	0.0061	0.0063	0.0064	0.0068	0.0073	0.0079	0.0084	0.0088
6	7.09959	92.9004	0.836596	0.466667	1.18097	4.61535	0.0014	0.0017	0.0016	0.002	0.0012	0.0015	0.0016	0.0014	0.0019	0.0019	0.0017	0.0018	0.0016	0.002	0.0021	0.0023	0.0022	0.0026	0.0024	0.0026	0.0028	0.0025	0.0027	0.0028	0.0033	0.0034	0.0034	0.0035	0.0037	0.0039	0.004	0.0045	0.0047	0.0053	0.0055	0.006	0.0062	0.0065	0.0069	0.0075	0.0082	0.0084	0.0091
7	7.14575	92.8542	0.685045	0.3	1.24015	4.92056	0.0005	0.0002	0.0004	0.0002	0.0001	0.0002	-0.0002	-0.0002	0.0002	0.0003	0.0003	0.0004	0.0002	0.0004	0.0007	0.0003	0.0007	0.0013	0.001	0.0009	0.001	0.0008	0.001	0.0011	0.0015	0.0019	0.002	0.0021	0.0023	0.0023	0.0028	0.0033	0.0033	0.0037	0.0039	0.0046	0.0046	0.005	0.0052	0.0056	0.0064	0.0067	0.0071
8	7.27677	92.7232	0.643631	0.833333	1.20495	4.59485	0.0023	0.0025	0.0025	0.0025	0.0021	0.0025	0.0023	0.0026	0.0024	0.0027	0.0024	0.0026	0.0026	0.0028	0.0032	0.003	0.0032	0.0034	0.0032	0.003	0.0033	0.0033	0.0036	0.0034	0.0038	0.0039	0.0039	0.004	0.0043	0.0043	0.0049	0.0051	0.0054	0.0057	0.0061	0.0067	0.0068	0.0072	0.0075	0.0078	0.0083	0.0088	0.0093
9	6.80998	93.19	0.582429	0.55	0.898669	4.77888	0.003	0.003	0.0029	0.003	0.0028	0.003	0.0026	0.0027	0.003	0.0032	0.0031	0.0031	0.0029	0.0033	0.0035	0.0034	0.0037	0.0041	0.0039	0.0038	0.0039	0.0039	0.0043	0.004	0.0045	0.0046	0.0046	0.0048	0.0052	0.0049	0.0053	0.0057	0.006	0.0061	0.0065	0.0069	0.0073	0.0078	0.008	0.0082	0.0091	0.0094	0.0098
10	6.69494	93.3051	0.574744	0.416667	1.10302	4.60051	0.0033	0.0034	0.0037	0.0034	0.0034	0.0036	0.0032	0.0035	0.0035	0.0038	0.0034	0.0033	0.0033	0.0037	0.0039	0.0039	0.004	0.0045	0.0043	0.0043	0.0044	0.0042	0.0048	0.0049	0.0048	0.005	0.0052	0.0054	0.0054	0.0055	0.0058	0.0063	0.0066	0.0065	0.0071	0.0076	0.0078	0.008	0.0083	0.0086	0.0096	0.01	0.0105
11	7.10433	92.8957	0.721664	0.5	1.14367	4.739	0.005	0.005	0.0055	0.0054	0.0049	0.0054	0.0051	0.0051	0.0053	0.0056	0.0053	0.0055	0.0052	0.0054	0.0058	0.0057	0.0059	0.0062	0.0061	0.0059	0.0062	0.0061	0.0065	0.0065	0.007	0.0071	0.0071	0.0075	0.0074	0.0075	0.0079	0.0081	0.0086	0.0086	0.0089	0.0094	0.0097	0.01	0.0104	0.0107	0.0113	0.0118	0.012
12	6.67247	93.3275	0.616709	0.5	1.06366	4.4921	0.0051	0.0051	0.0053	0.0054	0.005	0.0051	0.005	0.0053	0.0051	0.0054	0.0052	0.0052	0.005	0.0051	0.0056	0.0056	0.0059	0.0061	0.006	0.0058	0.0061	0.0062	0.0062	0.0063	0.0068	0.007	0.007	0.0069	0.0073	0.0074	0.0077	0.0079	0.0085	0.0086	0.0086	0.0092	0.0093	0.0096	0.0101	0.0102	0.011	0.0113	0.0117
13	6.54397	93.8233	0.601767	0.5	1.19813	4.24407	0.0048	0.0049	0.005	0.005	0.0049	0.005	0.0047	0.0051	0.0052	0.0055	0.0052	0.0051	0.0052	0.0055	0.0058	0.0055	0.0055	0.0059	0.0059	0.006	0.0062	0.0061	0.0063	0.0061	0.0066	0.0066	0.0067	0.0069	0.0072	0.0073	0.0074	0.008	0.0078	0.0083	0.0086	0.0091	0.0091	0.0096	0.0098	0.0104	0.011	0.0112	0.0116
14	7.09031	92.9097	0.541101	0.5	1.25947	4.78974	0.0046	0.0044	0.0047	0.0048	0.0043	0.0044	0.0043	0.0044	0.0048	0.0048	0.0046	0.0049	0.0045	0.0051	0.0052	0.0048	0.0051	0.0054	0.0055	0.0052	0.0056	0.0053	0.0058	0.0058	0.0062	0.0061	0.0063	0.0064	0.0065	0.0068	0.0071	0.0073	0.0077	0.0079	0.008	0.0086	0.0088	0.0091	0.0096	0.0095	0.0104	0.0106	0.011
15	6.04239	93.9576	0.552287	0.4	1.42128	3.66882	0.006	0.0061	0.006	0.0062	0.0057	0.0061	0.0057	0.006	0.006	0.0063	0.0062	0.0063	0.0065	0.0067	0.0068	0.0068	0.0069	0.0073	0.0073	0.0073	0.0075	0.0073	0.0073	0.0074	0.0075	0.0078	0.0079	0.0081	0.0085	0.0083	0.0086	0.0088	0.0089	0.009	0.0097	0.0104	0.0106	0.0108	0.0111	0.0116	0.0122	0.0127	0.013
16	4.10001	95.9	0.325546	0.5	1.02849	2.24596	0.0059	0.0058	0.0059	0.0059	0.0057	0.0058	0.0055	0.0056	0.0058	0.006	0.0056	0.0056	0.0057	0.0057	0.0062	0.0061	0.0062	0.0064	0.0064	0.0061	0.0064	0.0063	0.0068	0.0066	0.0069	0.007	0.007	0.0072	0.0074	0.0076	0.0079	0.008	0.008	0.0084	0.0087	0.0092	0.0093	0.0095	0.0099	0.0103	0.0111	0.0113	0.0118
17	6.4952	93.5048	0.54658	0.3	1.24549	4.40313	0.0059	0.0058	0.0057	0.006	0.0058	0.0062	0.0056	0.0058	0.0063	0.0061	0.0059	0.0063	0.0059	0.0062	0.0065	0.0068	0.0068	0.0067	0.007	0.0067	0.0069	0.0071	0.0073	0.0072	0.0075	0.0073	0.0075	0.0078	0.0078	0.0078	0.0084	0.0086	0.0089	0.0091	0.0094	0.0101	0.0104	0.0106	0.0108	0.0112	0.0119	0.0122	0.0124
18	7.04947	92.9505	0.533428	0.8	1.49113	4.22491	0.0065	0.0065	0.0066	0.0069	0.0063	0.0069	0.0065	0.0066	0.0066	0.0069	0.0069	0.0071	0.0069	0.007	0.0074	0.0071	0.0072	0.0075	0.0076	0.0074	0.0078	0.0074	0.0077	0.0079	0.0083	0.0082	0.0084	0.0084	0.0088	0.0086	0.0089	0.0092	0.0095	0.0099	0.0101	0.0109	0.0109	0.0116	0.0118	0.0119	0.0126	0.0133	0.0136
19	5.68742	94.3126	0.654561	0.2	1.0119	3.82096	0.0055	0.0053	0.0055	0.0054	0.0051	0.0056	0.0052	0.0055	0.0057	0.0056	0.0057	0.0055	0.0057	0.0058	0.0062	0.0059	0.006	0.0064	0.0065	0.0063	0.0065	0.0065	0.0068	0.0066	0.0069	0.007	0.0071	0.0071	0.0073	0.0074	0.0078	0.0081	0.0083	0.0087	0.0089	0.0095	0.0097	0.0098	0.0101	0.0104	0.011	0.0113	0.0119
20	5.94588	94.0541	0.686691	0.3	1.19296	3.76622	0.0068	0.0071	0.007	0.0073	0.0069	0.0071	0.0069	0.007	0.0074	0.0073	0.0073	0.0072	0.0073	0.0075	0.0079	0.0075	0.0077	0.0081	0.0083	0.0082	0.0083	0.0079	0.0083	0.008	0.0085	0.0088	0.009	0.009	0.009	0.0092	0.0095	0.01	0.0102	0.0103	0.0105	0.0112	0.0116	0.0119	0.012	0.0123	0.013	0.0135	0.0139
21	6.66332	93.3367	0.716923	0.5	1.22065	4.22575	0.0028	0.0032	0.0031	0.0028	0.0034	0.0033	0.0029	0.0032	0.0034	0.003	0.0033	0.0032	0.0033	0.0034	0.0034	0.003	0.0037	0.0034	0.0038	0.0042	0.0047	0.0041	0.0047	0.0048	0.0048	0.0051	0.0053	0.0054	0.0061	0.0061	0.0066	0.0065	0.007	0.0077	0.0081	0.0081	0.0084	0.0094	0.0098	0.0098	0.0105	0.0114	0.0123
22	6.27735	93.7226	0.657037	0.5	1.57764	3.54267	0.0023	0.0024	0.0025	0.0028	0.0027	0.0027	0.0025	0.0026	0.0031	0.0022	0.0026	0.003	0.0025	0.0031	0.0029	0.0028	0.0033	0.0033	0.0035	0.0036	0.0041	0.0041	0.004	0.0044	0.0041	0.0044	0.0049	0.0051	0.006	0.0054	0.0057	0.0062	0.0066	0.0071	0.0075	0.0077	0.0086	0.009	0.0093	0.0094	0.01	0.011	0.0118
23	4.78579	95.2142	0.550175	0.4	1.09653	2.73908	0.0035	0.0034	0.0033	0.0038	0.0039	0.0037	0.0038	0.0038	0.004	0.0037	0.0039	0.004	0.0038	0.0042	0.0041	0.004	0.0045	0.0043	0.0046	0.0046	0.0052	0.0055	0.0053	0.0057	0.0057	0.0057	0.0062	0.0064	0.0074	0.0072	0.007	0.0076	0.0078	0.0082	0.0087	0.0089	0.0094	0.0098	0.0105	0.0106	0.0108	0.0118	0.0126
24	5.79336	94.2066	0.634207	0.2	1.58215	3.377	0.0041	0.0042	0.0043	0.0046	0.0046	0.0045	0.0044	0.0049	0.0049	0.0045	0.0045	0.0049	0.0043	0.005	0.0049	0.0047	0.005	0.0054	0.0054	0.0053	0.0059	0.0061	0.0059	0.0064	0.0063	0.0065	0.0069	0.007	0.0077	0.0078	0.0075	0.0077	0.0083	0.009	0.0097	0.0099	0.0106	0.0109	0.0114	0.0114	0.0122	0.0132	0.0137
25	6.11862	93.8814	0.702483	0.2	1.19352	4.02262	0.0043	0.0046	0.0045	0.0049	0.005	0.0046	0.0045	0.0048	0.005	0.0044	0.0045	0.0047	0.0043	0.005	0.005	0.005	0.0052	0.0052	0.0057	0.0056	0.0061	0.0061	0.0059	0.0065	0.0066	0.0065	0.007	0.007	0.0081	0.0075	0.0078	0.0085	0.0087	0.0093	0.0098	0.0098	0.0103	0.0109	0.0113	0.0116	0.0118	0.0127	0.0134
26	6.18787	93.8121	0.637622	0.4	1.30719	3.84305	0.0031	0.003	0.0031	0.0031	0.0035	0.0034	0.0035	0.0036	0.0036	0.0033	0.0033	0.0035	0.0033	0.0036	0.0038	0.0036	0.004	0.0043	0.0043	0.0043	0.0045	0.0047	0.0048	0.0051	0.0047	0.0054	0.0059	0.0059	0.0069	0.0065	0.0065	0.0069	0.0073	0.0079	0.0085	0.0086	0.0093	0.0098	0.0101	0.0101	0.0106	0.0114	0.0125
27	7.09203	92.908	0.630197	0.5	1.39244	4.56939	0.0019	0.002	0.0022	0.0026	0.0027	0.0022	0.0022	0.0025	0.0026	0.0022	0.0025	0.0025	0.0023	0.0025	0.0028	0.0025	0.0028	0.0029	0.0032	0.003	0.0037	0.0039	0.0036	0.0041	0.004	0.004	0.0047	0.0047	0.0057	0.0052	0.0052	0.0057	0.0061	0.0066	0.0072	0.0073	0.0078	0.0084	0.0087	0.009	0.0095	0.0104	0.0113
28	7.23932	92.7607	0.566212	0.6	1.23202	4.84108	0.0043	0.0048	0.0047	0.005	0.0048	0.0049	0.0045	0.0048	0.0047	0.0044	0.0042	0.0047	0.0044	0.0055	0.0051	0.005	0.0051	0.0054	0.0055	0.0054	0.006	0.0062	0.0064	0.0066	0.0067	0.0065	0.0071	0.0073	0.0081	0.0077	0.0079	0.0081	0.0085	0.0092	0.0096	0.0097	0.0102	0.0107	0.0114	0.0112	0.012	0.0129	0.0136
29	6.45774	93.5423	0.605145	0.5	1.50176	3.85084	0.0022	0.0023	0.0023	0.0027	0.0023	0.0023	0.0025	0.0026	0.0026	0.002	0.0024	0.0028	0.0022	0.0031	0.0026	0.0027	0.0029	0.003	0.0035	0.0033	0.0039	0.0038	0.0038	0.004	0.0042	0.0042	0.0049	0.0047	0.0054	0.0057	0.0059	0.0058	0.006	0.007	0.0073	0.0076	0.0081	0.0084	0.0089	0.0091	0.0099	0.0107	0.0112
30	7.02704	92.973	0.594823	0.3	0.463728	5.66849	0.0013	0.0016	0.0016	0.0019	0.002	0.0016	0.0016	0.0021	0.0018	0.0018	0.0016	0.0019	0.0015	0.0022	0.002	0.0021	0.0024	0.0021	0.0027	0.0025	0.0033	0.0033	0.0031	0.0038	0.0034	0.0035	0.0041	0.0042	0.0046	0.0051	0.0045	0.005	0.0054	0.0059	0.0067	0.0068	0.0072	0.0075	0.0083	0.0083	0.0087	0.0098	0.0105
31	7.08187	92.9181	0.606901	0.5	1.42857	4.5464	0.0021	0.002	0.0022	0.0024	0.0024	0.0022	0.002	0.0023	0.0024	0.0017	0.0024	0.0024	0.0021	0.0026	0.0026	0.0027	0.0031	0.003	0.0031	0.0029	0.0037	0.0038	0.0035	0.0041	0.0039	0.004	0.0046	0.0048	0.0054	0.0056	0.0054	0.0056	0.0061	0.0067	0.0072	0.0076	0.0078	0.008	0.0088	0.0088	0.0094	0.0106	0.0113
32	6.42379	93.5762	0.673094	0.5	1.34188	3.90882	0.0022	0.0022	0.002	0.0026	0.0023	0.0026	0.0022	0.0027	0.0026	0.0024	0.0026	0.0029	0.0024	0.0027	0.0027	0.0027	0.0032	0.003	0.003	0.0032	0.0038	0.0039	0.0039	0.0045	0.004	0.0042	0.0046	0.005	0.0054	0.0056	0.0053	0.0058	0.0062	0.007	0.0074	0.0075	0.0081	0.0086	0.0089	0.0092	0.0097	0.0107	0.0112
33	6.09303	93.907	0.612976	0.5	1.24549	3.73457	0.0013	0.0017	0.0014	0.0019	0.0018	0.0015	0.0017	0.002	0.0018	0.0013	0.0018	0.0017	0.0016	0.0021	0.0022	0.0018	0.0022	0.0023	0.0026	0.0027	0.0033	0.0032	0.0029	0.0034	0.0031	0.0032	0.0042	0.0041	0.005	0.0046	0.0046	0.0051	0.0056	0.0059	0.0064	0.0064	0.0072	0.0073	0.008	0.0084	0.0086	0.0094	0.0103
34	6.24277	93.7572	0.563364	0.4	1.45306	3.82635	0.0021	0.0023	0.0022	0.0027	0.0026	0.0026	0.0025	0.0025	0.0028	0.0021	0.0024	0.0027	0.0022	0.0031	0.0028	0.0028	0.0028	0.0032	0.0033	0.0034	0.0041	0.004	0.004	0.004	0.0042	0.004	0.0047	0.0045	0.0055	0.0056	0.0057	0.0062	0.0064	0.0071	0.0075	0.0076	0.0083	0.0085	0.009	0.0093	0.0096	0.0106	0.0112
35	6.81761	93.1824	0.668111	0.4	1.30658	4.44292	-0.0007	-0.0004	-0.0006	0	-0.0002	0	0.0001	0.0001	0.0005	0	0.0002	0.0004	0	0.0005	0.0004	0.0004	0.0007	0.001	0.0012	0.0011	0.0019	0.0019	0.0018	0.0023	0.002	0.0025	0.003	0.0031	0.0033	0.0038	0.0035	0.0037	0.0041	0.0049	0.0053	0.0055	0.006	0.0064	0.0071	0.0072	0.0078	0.0086	0.0095
36	7.00787	92.9921	0.3455	0.6	1.25133	4.81104	0.0017	0.002	0.0019	0.0022	0.0023	0.0021	0.0019	0.0021	0.0024	0.0019	0.0024	0.0025	0.0021	0.0028	0.0024	0.0024	0.0029	0.0027	0.0031	0.003	0.0036	0.0036	0.0036	0.0041	0.0038	0.0041	0.0046	0.0047	0.0053	0.0052	0.0051	0.0053	0.0058	0.0064	0.0069	0.0071	0.0077	0.0082	0.0085	0.0084	0.0092	0.01	0.0109
37	5.05907	94.9409	0.529131	0.4	1.14721	2.98273	0.0022	0.0026	0.0025	0.0027	0.0029	0.0028	0.0022	0.0032	0.0027	0.0024	0.0029	0.0026	0.0024	0.0029	0.0033	0.0027	0.0031	0.0032	0.0032	0.0033	0.004	0.004	0.0039	0.0046	0.0041	0.0045	0.005	0.005	0.0056	0.0058	0.0056	0.0058	0.0062	0.0072	0.0075	0.0075	0.0082	0.0086	0.0089	0.009	0.0096	0.0107	0.0115
38	7.0284	92.9716	0.709151	0.5	1.35659	4.46266	0.0016	0.0018	0.0018	0.002	0.0019	0.0019	0.0021	0.0022	0.0022	0.0017	0.002	0.0024	0.0019	0.0025	0.002	0.0023	0.0025	0.0025	0.0024	0.0026	0.0032	0.0037	0.0033	0.0037	0.0035	0.0036	0.0042	0.0046	0.0048	0.0051	0.0049	0.0052	0.0059	0.0063	0.0071	0.0071	0.0075	0.0078	0.0084	0.0086	0.009	0.0098	0.0109
39	6.36877	93.6312	0.692524	0.3	1.14721	4.22904	0.0009	0.0011	0.0013	0.0017	0.0016	0.0014	0.0012	0.0019	0.0015	0.0013	0.0013	0.0019	0.0014	0.002	0.0018	0.0019	0.0018	0.002	0.0022	0.0023	0.0027	0.0029	0.0029	0.0031	0.003	0.0032	0.0036	0.0037	0.0045	0.0045	0.0043	0.0047	0.0054	0.0062	0.0064	0.0066	0.0069	0.0076	0.008	0.0082	0.0088	0.0096	0.0104
40	6.36339	93.6366	0.613476	0.5	1.51037	3.73954	0.001	0.0013	0.0013	0.0017	0.0017	0.0017	0.0012	0.0017	0.0018	0.0013	0.0017	0.0017	0.0013	0.0019	0.0018	0.0016	0.0019	0.002	0.0024	0.0023	0.0028	0.0029	0.003	0.0035	0.0032	0.0032	0.0037	0.004	0.0045	0.0048	0.0043	0.0048	0.0053	0.0059	0.0065	0.0066	0.0073	0.0075	0.0079	0.0078	0.0086	0.0095	0.0103
41	6.11987	93.8801	0.531884	0.4	1.08624	4.10175	0.0007	0.0007	0.0009	0.0013	0.0012	0.0011	0.0009	0.0016	0.0013	0.0008	0.0013	0.0014	0.0012	0.0015	0.0016	0.0012	0.0017	0.0015	0.0019	0.002	0.0023	0.0023	0.0027	0.0026	0.0026	0.0027	0.0035	0.0031	0.0036	0.0041	0.0038	0.0043	0.0047	0.0056	0.0059	0.0057	0.0064	0.0069	0.0072	0.0077	0.0081	0.009	0.0096
[truncated: 1,058 more columns]

## Sheet: SEASONS
BATCHES	SEASONS	ASH	SOLIDS	FAT	PROTEIN	CARBOHYDRATE BY DIFFERENCE
1	AUTUMN/WINTER	0.85	6.5	0.5	1.11	4.04
2	SPRING/SUMMER	0.92	6.48	0.2	0.84	4.52
3	SPRING/SUMMER	0.86	6.84	0.53	1.17	4.28
4	SPRING/SUMMER	0.44	7.04	0.57	1.17	4.86
5	SPRING/SUMMER	0.3	6.83	0.57	1.07	4.89
6	SPRING/SUMMER	0.91	7.1	0.47	1.18	4.54
7	SPRING/SUMMER	0.69	7.15	0.3	1.24	4.92
8	AUTUMN/WINTER	0.64	7.28	0.83	1.2	4.61
9	AUTUMN/WINTER	0.58	6.81	0.55	0.9	4.78
10	AUTUMN/WINTER	0.58	6.69	0.42	1.1	4.59
11	AUTUMN/WINTER	0.72	7.1	0.5	1.14	4.74
12	AUTUMN/WINTER	0.62	6.67	0.5	1.06	4.49
13	AUTUMN/WINTER	0.6	6.18	0.5	1.2	3.88
14	SPRING/SUMMER	0.54	7.09	0.5	1.26	4.79
15	SPRING/SUMMER	0.55	6.04	0.4	1.42	3.67
16	SPRING/SUMMER	0.32	4.1	0.5	1.03	2.25
17	SPRING/SUMMER	0.55	6.5	0.3	1.24	4.41
18	SPRING/SUMMER	0.53	7.05	0.8	1.49	4.23
19	AUTUMN/WINTER	0.65	5.7	0.2	1.01	3.84
20	AUTUMN/WINTER	0.69	5.95	0.3	1.19	3.77
21	AUTUMN/WINTER	0.72	6.66	0.5	1.22	4.22
22	AUTUMN/WINTER	0.66	6.28	0.5	1.58	3.54
24	SPRING/SUMMER	0.63	5.79	0.2	1.58	3.38

## Sheet: 1800-700
	1800	1799	1798	1797	1796	1795	1794	1793	1792	1791	1790	1789	1788	1787	1786	1785	1784	1783	1782	1781	1780	1779	1778	1777	1776	1775	1774	1773	1772	1771	1770	1769	1768	1767	1766	1765	1764	1763	1762	1761	1760	1759	1758	1757	1756	1755	1754	1753	1752
1	0.0022	0.0022	0.0025	0.0024	0.0021	0.0024	0.002	0.0022	0.0025	0.0022	0.0023	0.0021	0.0021	0.0023	0.0024	0.0022	0.0023	0.0028	0.0027	0.0028	0.0029	0.0029	0.0032	0.003	0.0035	0.0038	0.0039	0.0041	0.0044	0.0044	0.0048	0.0053	0.0056	0.0059	0.0063	0.007	0.0072	0.0075	0.0081	0.0085	0.0093	0.0095	0.0103	0.0108	0.0115	0.012	0.0127	0.0136	0.0142
2	0.0016	0.0019	0.0018	0.0019	0.0017	0.0019	0.0016	0.0018	0.0017	0.0023	0.0025	0.0029	0.0029	0.0029	0.0032	0.003	0.0033	0.0037	0.0036	0.0035	0.0036	0.0035	0.004	0.004	0.0044	0.0045	0.0048	0.0046	0.005	0.0052	0.0053	0.0059	0.0062	0.0065	0.0068	0.0072	0.0073	0.0079	0.0082	0.0087	0.0094	0.0099	0.0104	0.011	0.0117	0.0122	0.0126	0.0135	0.0139
3	0.0014	0.0014	0.0016	0.0016	0.0013	0.0015	0.0012	0.0013	0.0014	0.0017	0.0013	0.0013	0.0016	0.0017	0.0018	0.0019	0.002	0.0024	0.0023	0.002	0.0023	0.0022	0.0028	0.0025	0.0031	0.0031	0.0035	0.0035	0.0038	0.0039	0.0041	0.0045	0.0049	0.0054	0.0057	0.006	0.0061	0.0067	0.0071	0.0073	0.008	0.0086	0.0091	0.0096	0.0102	0.0108	0.0113	0.0121	0.0128
4	0.0017	0.0019	0.002	0.0022	0.002	0.0021	0.0016	0.0022	0.0022	0.002	0.002	0.0023	0.002	0.0025	0.0026	0.0022	0.0027	0.003	0.003	0.0028	0.0029	0.0029	0.0032	0.0033	0.0036	0.0036	0.0039	0.0041	0.0042	0.0043	0.0048	0.0052	0.0051	0.0055	0.006	0.0066	0.0068	0.0072	0.0075	0.0079	0.0085	0.0091	0.0095	0.01	0.0107	0.011	0.0118	0.0126	0.0131
5	0.0015	0.0015	0.0018	0.0018	0.0013	0.0015	0.0013	0.0012	0.0015	0.0018	0.0016	0.0017	0.0016	0.0016	0.002	0.0019	0.0021	0.0021	0.0023	0.0023	0.0024	0.0023	0.0027	0.0028	0.003	0.003	0.0032	0.0035	0.0036	0.0036	0.0044	0.0046	0.0049	0.0052	0.0054	0.0061	0.0063	0.0064	0.0068	0.0073	0.0079	0.0084	0.0088	0.0092	0.0097	0.0103	0.0108	0.0115	0.0118
6	0.0014	0.0017	0.0016	0.002	0.0012	0.0015	0.0016	0.0014	0.0019	0.0019	0.0017	0.0018	0.0016	0.002	0.0021	0.0023	0.0022	0.0026	0.0024	0.0026	0.0028	0.0025	0.0027	0.0028	0.0033	0.0034	0.0034	0.0035	0.0037	0.0039	0.004	0.0045	0.0047	0.0053	0.0055	0.006	0.0062	0.0065	0.0069	0.0075	0.0082	0.0084	0.0091	0.0093	0.0099	0.0102	0.011	0.0119	0.0123
7	0.0005	0.0002	0.0004	0.0002	0.0001	0.0002	-0.0002	-0.0002	0.0002	0.0003	0.0003	0.0004	0.0002	0.0004	0.0007	0.0003	0.0007	0.0013	0.001	0.0009	0.001	0.0008	0.001	0.0011	0.0015	0.0019	0.002	0.0021	0.0023	0.0023	0.0028	0.0033	0.0033	0.0037	0.0039	0.0046	0.0046	0.005	0.0052	0.0056	0.0064	0.0067	0.0071	0.0076	0.0084	0.0086	0.0095	0.01	0.0105
8	0.0023	0.0025	0.0025	0.0025	0.0021	0.0025	0.0023	0.0026	0.0024	0.0027	0.0024	0.0026	0.0026	0.0028	0.0032	0.003	0.0032	0.0034	0.0032	0.003	0.0033	0.0033	0.0036	0.0034	0.0038	0.0039	0.0039	0.004	0.0043	0.0043	0.0049	0.0051	0.0054	0.0057	0.0061	0.0067	0.0068	0.0072	0.0075	0.0078	0.0083	0.0088	0.0093	0.0097	0.0106	0.011	0.0115	0.0123	0.0127
9	0.003	0.003	0.0029	0.003	0.0028	0.003	0.0026	0.0027	0.003	0.0032	0.0031	0.0031	0.0029	0.0033	0.0035	0.0034	0.0037	0.0041	0.0039	0.0038	0.0039	0.0039	0.0043	0.004	0.0045	0.0046	0.0046	0.0048	0.0052	0.0049	0.0053	0.0057	0.006	0.0061	0.0065	0.0069	0.0073	0.0078	0.008	0.0082	0.0091	0.0094	0.0098	0.0103	0.0107	0.0111	0.012	0.0129	0.0134
10	0.0033	0.0034	0.0037	0.0034	0.0034	0.0036	0.0032	0.0035	0.0035	0.0038	0.0034	0.0033	0.0033	0.0037	0.0039	0.0039	0.004	0.0045	0.0043	0.0043	0.0044	0.0042	0.0048	0.0049	0.0048	0.005	0.0052	0.0054	0.0054	0.0055	0.0058	0.0063	0.0066	0.0065	0.0071	0.0076	0.0078	0.008	0.0083	0.0086	0.0096	0.01	0.0105	0.0109	0.0114	0.0118	0.0122	0.0131	0.0134
11	0.005	0.005	0.0055	0.0054	0.0049	0.0054	0.0051	0.0051	0.0053	0.0056	0.0053	0.0055	0.0052	0.0054	0.0058	0.0057	0.0059	0.0062	0.0061	0.0059	0.0062	0.0061	0.0065	0.0065	0.007	0.0071	0.0071	0.0075	0.0074	0.0075	0.0079	0.0081	0.0086	0.0086	0.0089	0.0094	0.0097	0.01	0.0104	0.0107	0.0113	0.0118	0.012	0.0124	0.0131	0.0137	0.0141	0.015	0.0154
12	0.0051	0.0051	0.0053	0.0054	0.005	0.0051	0.005	0.0053	0.0051	0.0054	0.0052	0.0052	0.005	0.0051	0.0056	0.0056	0.0059	0.0061	0.006	0.0058	0.0061	0.0062	0.0062	0.0063	0.0068	0.007	0.007	0.0069	0.0073	0.0074	0.0077	0.0079	0.0085	0.0086	0.0086	0.0092	0.0093	0.0096	0.0101	0.0102	0.011	0.0113	0.0117	0.0123	0.0129	0.0133	0.0138	0.0145	0.0151
13	0.0048	0.0049	0.005	0.005	0.0049	0.005	0.0047	0.0051	0.0052	0.0055	0.0052	0.0051	0.0052	0.0055	0.0058	0.0055	0.0055	0.0059	0.0059	0.006	0.0062	0.0061	0.0063	0.0061	0.0066	0.0066	0.0067	0.0069	0.0072	0.0073	0.0074	0.008	0.0078	0.0083	0.0086	0.0091	0.0091	0.0096	0.0098	0.0104	0.011	0.0112	0.0116	0.0121	0.0126	0.0129	0.0136	0.0147	0.0151
14	0.0046	0.0044	0.0047	0.0048	0.0043	0.0044	0.0043	0.0044	0.0048	0.0048	0.0046	0.0049	0.0045	0.0051	0.0052	0.0048	0.0051	0.0054	0.0055	0.0052	0.0056	0.0053	0.0058	0.0058	0.0062	0.0061	0.0063	0.0064	0.0065	0.0068	0.0071	0.0073	0.0077	0.0079	0.008	0.0086	0.0088	0.0091	0.0096	0.0095	0.0104	0.0106	0.011	0.0116	0.0123	0.0126	0.0133	0.014	0.0142
15	0.006	0.0061	0.006	0.0062	0.0057	0.0061	0.0057	0.006	0.006	0.0063	0.0062	0.0063	0.0065	0.0067	0.0068	0.0068	0.0069	0.0073	0.0073	0.0073	0.0075	0.0073	0.0073	0.0074	0.0075	0.0078	0.0079	0.0081	0.0085	0.0083	0.0086	0.0088	0.0089	0.009	0.0097	0.0104	0.0106	0.0108	0.0111	0.0116	0.0122	0.0127	0.013	0.0135	0.0137	0.0145	0.015	0.0158	0.0163
16	0.0059	0.0058	0.0059	0.0059	0.0057	0.0058	0.0055	0.0056	0.0058	0.006	0.0056	0.0056	0.0057	0.0057	0.0062	0.0061	0.0062	0.0064	0.0064	0.0061	0.0064	0.0063	0.0068	0.0066	0.0069	0.007	0.007	0.0072	0.0074	0.0076	0.0079	0.008	0.008	0.0084	0.0087	0.0092	0.0093	0.0095	0.0099	0.0103	0.0111	0.0113	0.0118	0.0123	0.0128	0.0131	0.014	0.0145	0.0147
17	0.0059	0.0058	0.0057	0.006	0.0058	0.0062	0.0056	0.0058	0.0063	0.0061	0.0059	0.0063	0.0059	0.0062	0.0065	0.0068	0.0068	0.0067	0.007	0.0067	0.0069	0.0071	0.0073	0.0072	0.0075	0.0073	0.0075	0.0078	0.0078	0.0078	0.0084	0.0086	0.0089	0.0091	0.0094	0.0101	0.0104	0.0106	0.0108	0.0112	0.0119	0.0122	0.0124	0.0129	0.0138	0.014	0.0144	0.0154	0.0159
18	0.0065	0.0065	0.0066	0.0069	0.0063	0.0069	0.0065	0.0066	0.0066	0.0069	0.0069	0.0071	0.0069	0.007	0.0074	0.0071	0.0072	0.0075	0.0076	0.0074	0.0078	0.0074	0.0077	0.0079	0.0083	0.0082	0.0084	0.0084	0.0088	0.0086	0.0089	0.0092	0.0095	0.0099	0.0101	0.0109	0.0109	0.0116	0.0118	0.0119	0.0126	0.0133	0.0136	0.0141	0.0145	0.0151	0.0156	0.0163	0.0167
19	0.0055	0.0053	0.0055	0.0054	0.0051	0.0056	0.0052	0.0055	0.0057	0.0056	0.0057	0.0055	0.0057	0.0058	0.0062	0.0059	0.006	0.0064	0.0065	0.0063	0.0065	0.0065	0.0068	0.0066	0.0069	0.007	0.0071	0.0071	0.0073	0.0074	0.0078	0.0081	0.0083	0.0087	0.0089	0.0095	0.0097	0.0098	0.0101	0.0104	0.011	0.0113	0.0119	0.0123	0.0127	0.0134	0.0141	0.0148	0.015
20	0.0068	0.0071	0.007	0.0073	0.0069	0.0071	0.0069	0.007	0.0074	0.0073	0.0073	0.0072	0.0073	0.0075	0.0079	0.0075	0.0077	0.0081	0.0083	0.0082	0.0083	0.0079	0.0083	0.008	0.0085	0.0088	0.009	0.009	0.009	0.0092	0.0095	0.01	0.0102	0.0103	0.0105	0.0112	0.0116	0.0119	0.012	0.0123	0.013	0.0135	0.0139	0.0142	0.015	0.0153	0.0159	0.0165	0.0169
21	0.0028	0.0032	0.0031	0.0028	0.0034	0.0033	0.0029	0.0032	0.0034	0.003	0.0033	0.0032	0.0033	0.0034	0.0034	0.003	0.0037	0.0034	0.0038	0.0042	0.0047	0.0041	0.0047	0.0048	0.0048	0.0051	0.0053	0.0054	0.0061	0.0061	0.0066	0.0065	0.007	0.0077	0.0081	0.0081	0.0084	0.0094	0.0098	0.0098	0.0105	0.0114	0.0123	0.0129	0.0136	0.0138	0.0144	0.0155	0.0164
22	0.0023	0.0024	0.0025	0.0028	0.0027	0.0027	0.0025	0.0026	0.0031	0.0022	0.0026	0.003	0.0025	0.0031	0.0029	0.0028	0.0033	0.0033	0.0035	0.0036	0.0041	0.0041	0.004	0.0044	0.0041	0.0044	0.0049	0.0051	0.006	0.0054	0.0057	0.0062	0.0066	0.0071	0.0075	0.0077	0.0086	0.009	0.0093	0.0094	0.01	0.011	0.0118	0.0126	0.013	0.0134	0.014	0.0149	0.0157
23	0.0035	0.0034	0.0033	0.0038	0.0039	0.0037	0.0038	0.0038	0.004	0.0037	0.0039	0.004	0.0038	0.0042	0.0041	0.004	0.0045	0.0043	0.0046	0.0046	0.0052	0.0055	0.0053	0.0057	0.0057	0.0057	0.0062	0.0064	0.0074	0.0072	0.007	0.0076	0.0078	0.0082	0.0087	0.0089	0.0094	0.0098	0.0105	0.0106	0.0108	0.0118	0.0126	0.0135	0.0139	0.0143	0.0151	0.0161	0.017
24	0.0041	0.0042	0.0043	0.0046	0.0046	0.0045	0.0044	0.0049	0.0049	0.0045	0.0045	0.0049	0.0043	0.005	0.0049	0.0047	0.005	0.0054	0.0054	0.0053	0.0059	0.0061	0.0059	0.0064	0.0063	0.0065	0.0069	0.007	0.0077	0.0078	0.0075	0.0077	0.0083	0.009	0.0097	0.0099	0.0106	0.0109	0.0114	0.0114	0.0122	0.0132	0.0137	0.0143	0.0153	0.0154	0.0161	0.017	0.0178
25	0.0043	0.0046	0.0045	0.0049	0.005	0.0046	0.0045	0.0048	0.005	0.0044	0.0045	0.0047	0.0043	0.005	0.005	0.005	0.0052	0.0052	0.0057	0.0056	0.0061	0.0061	0.0059	0.0065	0.0066	0.0065	0.007	0.007	0.0081	0.0075	0.0078	0.0085	0.0087	0.0093	0.0098	0.0098	0.0103	0.0109	0.0113	0.0116	0.0118	0.0127	0.0134	0.0145	0.0146	0.0155	0.0161	0.0171	0.0178
26	0.0031	0.003	0.0031	0.0031	0.0035	0.0034	0.0035	0.0036	0.0036	0.0033	0.0033	0.0035	0.0033	0.0036	0.0038	0.0036	0.004	0.0043	0.0043	0.0043	0.0045	0.0047	0.0048	0.0051	0.0047	0.0054	0.0059	0.0059	0.0069	0.0065	0.0065	0.0069	0.0073	0.0079	0.0085	0.0086	0.0093	0.0098	0.0101	0.0101	0.0106	0.0114	0.0125	0.0133	0.0136	0.0141	0.0147	0.0158	0.017
27	0.0019	0.002	0.0022	0.0026	0.0027	0.0022	0.0022	0.0025	0.0026	0.0022	0.0025	0.0025	0.0023	0.0025	0.0028	0.0025	0.0028	0.0029	0.0032	0.003	0.0037	0.0039	0.0036	0.0041	0.004	0.004	0.0047	0.0047	0.0057	0.0052	0.0052	0.0057	0.0061	0.0066	0.0072	0.0073	0.0078	0.0084	0.0087	0.009	0.0095	0.0104	0.0113	0.0119	0.0126	0.0128	0.0138	0.0148	0.0158
28	0.0043	0.0048	0.0047	0.005	0.0048	0.0049	0.0045	0.0048	0.0047	0.0044	0.0042	0.0047	0.0044	0.0055	0.0051	0.005	0.0051	0.0054	0.0055	0.0054	0.006	0.0062	0.0064	0.0066	0.0067	0.0065	0.0071	0.0073	0.0081	0.0077	0.0079	0.0081	0.0085	0.0092	0.0096	0.0097	0.0102	0.0107	0.0114	0.0112	0.012	0.0129	0.0136	0.0143	0.0152	0.0152	0.0159	0.017	0.0179
29	0.0022	0.0023	0.0023	0.0027	0.0023	0.0023	0.0025	0.0026	0.0026	0.002	0.0024	0.0028	0.0022	0.0031	0.0026	0.0027	0.0029	0.003	0.0035	0.0033	0.0039	0.0038	0.0038	0.004	0.0042	0.0042	0.0049	0.0047	0.0054	0.0057	0.0059	0.0058	0.006	0.007	0.0073	0.0076	0.0081	0.0084	0.0089	0.0091	0.0099	0.0107	0.0112	0.0119	0.0127	0.0127	0.0138	0.0147	0.0155
30	0.0013	0.0016	0.0016	0.0019	0.002	0.0016	0.0016	0.0021	0.0018	0.0018	0.0016	0.0019	0.0015	0.0022	0.002	0.0021	0.0024	0.0021	0.0027	0.0025	0.0033	0.0033	0.0031	0.0038	0.0034	0.0035	0.0041	0.0042	0.0046	0.0051	0.0045	0.005	0.0054	0.0059	0.0067	0.0068	0.0072	0.0075	0.0083	0.0083	0.0087	0.0098	0.0105	0.0112	0.012	0.0121	0.013	0.0138	0.0148
31	0.0021	0.002	0.0022	0.0024	0.0024	0.0022	0.002	0.0023	0.0024	0.0017	0.0024	0.0024	0.0021	0.0026	0.0026	0.0027	0.0031	0.003	0.0031	0.0029	0.0037	0.0038	0.0035	0.0041	0.0039	0.004	0.0046	0.0048	0.0054	0.0056	0.0054	0.0056	0.0061	0.0067	0.0072	0.0076	0.0078	0.008	0.0088	0.0088	0.0094	0.0106	0.0113	0.0119	0.0124	0.0128	0.0135	0.0145	0.0154
32	0.0022	0.0022	0.002	0.0026	0.0023	0.0026	0.0022	0.0027	0.0026	0.0024	0.0026	0.0029	0.0024	0.0027	0.0027	0.0027	0.0032	0.003	0.003	0.0032	0.0038	0.0039	0.0039	0.0045	0.004	0.0042	0.0046	0.005	0.0054	0.0056	0.0053	0.0058	0.0062	0.007	0.0074	0.0075	0.0081	0.0086	0.0089	0.0092	0.0097	0.0107	0.0112	0.0121	0.0127	0.0128	0.0136	0.0145	0.0155
33	0.0013	0.0017	0.0014	0.0019	0.0018	0.0015	0.0017	0.002	0.0018	0.0013	0.0018	0.0017	0.0016	0.0021	0.0022	0.0018	0.0022	0.0023	0.0026	0.0027	0.0033	0.0032	0.0029	0.0034	0.0031	0.0032	0.0042	0.0041	0.005	0.0046	0.0046	0.0051	0.0056	0.0059	0.0064	0.0064	0.0072	0.0073	0.008	0.0084	0.0086	0.0094	0.0103	0.0114	0.0115	0.0121	0.0127	0.0139	0.0146
34	0.0021	0.0023	0.0022	0.0027	0.0026	0.0026	0.0025	0.0025	0.0028	0.0021	0.0024	0.0027	0.0022	0.0031	0.0028	0.0028	0.0028	0.0032	0.0033	0.0034	0.0041	0.004	0.004	0.004	0.0042	0.004	0.0047	0.0045	0.0055	0.0056	0.0057	0.0062	0.0064	0.0071	0.0075	0.0076	0.0083	0.0085	0.009	0.0093	0.0096	0.0106	0.0112	0.0123	0.0125	0.0132	0.0138	0.0147	0.0157
35	-0.0007	-0.0004	-0.0006	0	-0.0002	0	0.0001	0.0001	0.0005	0	0.0002	0.0004	0	0.0005	0.0004	0.0004	0.0007	0.001	0.0012	0.0011	0.0019	0.0019	0.0018	0.0023	0.002	0.0025	0.003	0.0031	0.0033	0.0038	0.0035	0.0037	0.0041	0.0049	0.0053	0.0055	0.006	0.0064	0.0071	0.0072	0.0078	0.0086	0.0095	0.01	0.0107	0.0108	0.0117	0.0124	0.0133
36	0.0017	0.002	0.0019	0.0022	0.0023	0.0021	0.0019	0.0021	0.0024	0.0019	0.0024	0.0025	0.0021	0.0028	0.0024	0.0024	0.0029	0.0027	0.0031	0.003	0.0036	0.0036	0.0036	0.0041	0.0038	0.0041	0.0046	0.0047	0.0053	0.0052	0.0051	0.0053	0.0058	0.0064	0.0069	0.0071	0.0077	0.0082	0.0085	0.0084	0.0092	0.01	0.0109	0.0116	0.012	0.0123	0.0131	0.0143	0.0152
37	0.0022	0.0026	0.0025	0.0027	0.0029	0.0028	0.0022	0.0032	0.0027	0.0024	0.0029	0.0026	0.0024	0.0029	0.0033	0.0027	0.0031	0.0032	0.0032	0.0033	0.004	0.004	0.0039	0.0046	0.0041	0.0045	0.005	0.005	0.0056	0.0058	0.0056	0.0058	0.0062	0.0072	0.0075	0.0075	0.0082	0.0086	0.0089	0.009	0.0096	0.0107	0.0115	0.012	0.0125	0.0127	0.0134	0.0144	0.0155
38	0.0016	0.0018	0.0018	0.002	0.0019	0.0019	0.0021	0.0022	0.0022	0.0017	0.002	0.0024	0.0019	0.0025	0.002	0.0023	0.0025	0.0025	0.0024	0.0026	0.0032	0.0037	0.0033	0.0037	0.0035	0.0036	0.0042	0.0046	0.0048	0.0051	0.0049	0.0052	0.0059	0.0063	0.0071	0.0071	0.0075	0.0078	0.0084	0.0086	0.009	0.0098	0.0109	0.0116	0.0118	0.0125	0.0132	0.0143	0.0149
39	0.0009	0.0011	0.0013	0.0017	0.0016	0.0014	0.0012	0.0019	0.0015	0.0013	0.0013	0.0019	0.0014	0.002	0.0018	0.0019	0.0018	0.002	0.0022	0.0023	0.0027	0.0029	0.0029	0.0031	0.003	0.0032	0.0036	0.0037	0.0045	0.0045	0.0043	0.0047	0.0054	0.0062	0.0064	0.0066	0.0069	0.0076	0.008	0.0082	0.0088	0.0096	0.0104	0.011	0.0114	0.0117	0.0126	0.0137	0.0144
40	0.001	0.0013	0.0013	0.0017	0.0017	0.0017	0.0012	0.0017	0.0018	0.0013	0.0017	0.0017	0.0013	0.0019	0.0018	0.0016	0.0019	0.002	0.0024	0.0023	0.0028	0.0029	0.003	0.0035	0.0032	0.0032	0.0037	0.004	0.0045	0.0048	0.0043	0.0048	0.0053	0.0059	0.0065	0.0066	0.0073	0.0075	0.0079	0.0078	0.0086	0.0095	0.0103	0.011	0.0114	0.0118	0.0123	0.0134	0.0142
41	0.0007	0.0007	0.0009	0.0013	0.0012	0.0011	0.0009	0.0016	0.0013	0.0008	0.0013	0.0014	0.0012	0.0015	0.0016	0.0012	0.0017	0.0015	0.0019	0.002	0.0023	0.0023	0.0027	0.0026	0.0026	0.0027	0.0035	0.0031	0.0036	0.0041	0.0038	0.0043	0.0047	0.0056	0.0059	0.0057	0.0064	0.0069	0.0072	0.0077	0.0081	0.009	0.0096	0.0103	0.0111	0.0116	0.0118	0.0129	0.0141
[truncated: 1,052 more columns]

## Sheet: 1400-866
	1400	1399	1398	1397	1396	1395	1394	1393	1392	1391	1390	1389	1388	1387	1386	1385	1384	1383	1382	1381	1380	1379	1378	1377	1376	1375	1374	1373	1372	1371	1370	1369	1368	1367	1366	1365	1364	1363	1362	1361	1360	1359	1358	1357	1356	1355	1354	1353	1352
1	0.002	0.0027	0.0033	0.004	0.0051	0.0068	0.0086	0.0114	0.0144	0.0184	0.0233	0.0286	0.0352	0.0424	0.0506	0.0593	0.0687	0.0786	0.089	0.0997	0.1103	0.1213	0.1318	0.1418	0.1523	0.1621	0.1712	0.1807	0.1907	0.2006	0.2104	0.2212	0.2322	0.2439	0.2557	0.2682	0.2811	0.2948	0.3084	0.322	0.3358	0.3497	0.3628	0.3754	0.3875	0.3987	0.4102	0.4205	0.4312
2	0.0025	0.0031	0.0035	0.0041	0.005	0.0065	0.0082	0.0106	0.0133	0.017	0.0214	0.0262	0.0318	0.0383	0.0456	0.0536	0.0619	0.0709	0.0804	0.09	0.1	0.1098	0.1191	0.1283	0.1373	0.1466	0.1547	0.1637	0.1729	0.1821	0.1911	0.2011	0.2115	0.2223	0.2334	0.2449	0.2569	0.2697	0.2823	0.295	0.3075	0.3202	0.3325	0.3439	0.3553	0.3656	0.3761	0.3853	0.3952
3	0.0015	0.0021	0.0024	0.0031	0.0042	0.0058	0.0078	0.0102	0.0133	0.0171	0.0215	0.0268	0.0329	0.0397	0.0472	0.0554	0.0641	0.0735	0.0833	0.0931	0.103	0.1133	0.1229	0.1323	0.1417	0.1512	0.1598	0.1689	0.1785	0.1881	0.1977	0.2081	0.2189	0.2304	0.2419	0.2542	0.2668	0.2804	0.2937	0.3073	0.3206	0.3342	0.3472	0.3597	0.3717	0.3828	0.3942	0.4044	0.4151
4	0.0018	0.0024	0.0029	0.0036	0.0046	0.0061	0.0079	0.0104	0.0134	0.0172	0.0217	0.0265	0.0324	0.0391	0.0466	0.0544	0.0627	0.0718	0.0812	0.0908	0.1004	0.1103	0.1197	0.1288	0.1382	0.1471	0.1556	0.1644	0.1739	0.1831	0.1927	0.203	0.2136	0.2248	0.2366	0.2486	0.2611	0.2745	0.2877	0.3013	0.3145	0.3279	0.3409	0.3531	0.3653	0.3764	0.3877	0.398	0.4086
5	0.0015	0.0023	0.0028	0.0034	0.0041	0.0056	0.0075	0.0098	0.0124	0.0161	0.0202	0.0249	0.0303	0.0365	0.0436	0.0512	0.0593	0.0677	0.077	0.0861	0.0953	0.105	0.1138	0.1229	0.1321	0.141	0.1493	0.1582	0.1673	0.1765	0.186	0.1958	0.2065	0.2176	0.2292	0.2412	0.2535	0.267	0.28	0.2934	0.3071	0.3202	0.3333	0.3456	0.3576	0.3689	0.3801	0.3903	0.401
6	0.0011	0.0017	0.0022	0.0028	0.0038	0.0053	0.007	0.0096	0.0123	0.016	0.0203	0.0251	0.0307	0.037	0.0442	0.0513	0.0595	0.068	0.0771	0.0861	0.0955	0.105	0.1138	0.1226	0.1314	0.1401	0.1483	0.157	0.1659	0.1752	0.1843	0.1941	0.2049	0.2159	0.2273	0.2392	0.2516	0.2647	0.2778	0.291	0.3044	0.3175	0.3303	0.3424	0.3545	0.3655	0.3767	0.3867	0.3972
7	0.0006	0.0012	0.0016	0.0023	0.0031	0.0046	0.0063	0.0085	0.0113	0.0148	0.0187	0.0231	0.0285	0.0344	0.0413	0.0484	0.0561	0.0642	0.0728	0.0815	0.0906	0.0999	0.1087	0.1173	0.1258	0.1344	0.1424	0.1505	0.1596	0.1687	0.1778	0.1875	0.1979	0.209	0.2205	0.2324	0.2446	0.2576	0.2706	0.2841	0.2974	0.3106	0.3234	0.3358	0.348	0.3589	0.37	0.3802	0.3908
8	0.0022	0.0026	0.003	0.0036	0.0045	0.0061	0.0082	0.0104	0.0131	0.0167	0.0208	0.0254	0.0311	0.0374	0.0442	0.0514	0.0592	0.0673	0.0759	0.0849	0.0939	0.1028	0.1115	0.1201	0.1285	0.137	0.1449	0.1533	0.162	0.1709	0.1801	0.1899	0.2004	0.2115	0.2229	0.2348	0.247	0.2599	0.2728	0.286	0.2993	0.3122	0.325	0.337	0.349	0.3602	0.3712	0.3813	0.3918
9	0.0024	0.0032	0.0035	0.0041	0.0049	0.0064	0.0086	0.0106	0.0133	0.0168	0.0209	0.0255	0.0309	0.0369	0.0437	0.0508	0.0583	0.0664	0.0748	0.0834	0.0922	0.1011	0.1096	0.1178	0.1263	0.1345	0.1423	0.1505	0.1591	0.168	0.1771	0.1867	0.197	0.2079	0.2192	0.2309	0.2429	0.2557	0.2686	0.2817	0.2948	0.3077	0.3202	0.3323	0.3439	0.3548	0.3658	0.3758	0.3864
10	0.0027	0.0034	0.0041	0.0045	0.0053	0.0066	0.0086	0.0106	0.0131	0.0165	0.0202	0.0247	0.0298	0.0356	0.0422	0.0491	0.0564	0.064	0.0724	0.081	0.0894	0.0981	0.1063	0.1147	0.1229	0.1312	0.139	0.147	0.1559	0.1645	0.1736	0.1831	0.1933	0.2042	0.2156	0.2273	0.2395	0.2526	0.2654	0.2786	0.2919	0.305	0.3173	0.3295	0.3414	0.3524	0.3635	0.3737	0.3844
11	0.0046	0.0052	0.0055	0.0062	0.0071	0.0084	0.0104	0.0125	0.015	0.0186	0.0224	0.0267	0.0318	0.0376	0.0441	0.0509	0.0583	0.066	0.0741	0.0825	0.0909	0.0995	0.1077	0.1158	0.1239	0.1323	0.1399	0.1479	0.1568	0.1652	0.1741	0.1837	0.1938	0.2048	0.2161	0.2276	0.2398	0.2527	0.2656	0.2787	0.2919	0.3049	0.3173	0.3294	0.3412	0.3522	0.3634	0.3734	0.3838
12	0.0044	0.0052	0.0058	0.0064	0.0072	0.0087	0.0103	0.0122	0.0146	0.0177	0.0214	0.0254	0.0306	0.036	0.0421	0.0486	0.0557	0.0631	0.0709	0.0793	0.0875	0.096	0.1041	0.1119	0.12	0.1281	0.1355	0.1434	0.1522	0.1608	0.1696	0.179	0.1891	0.2	0.2113	0.2226	0.2345	0.2474	0.2602	0.2733	0.2865	0.2996	0.3118	0.3238	0.3357	0.3467	0.3578	0.3678	0.3784
13	0.0042	0.0048	0.0053	0.0059	0.0067	0.0081	0.01	0.0119	0.0145	0.0177	0.0215	0.0257	0.0307	0.0363	0.0425	0.0491	0.0564	0.0639	0.0718	0.08	0.0883	0.0967	0.1045	0.1126	0.1205	0.1285	0.136	0.1438	0.1525	0.1611	0.17	0.1793	0.1894	0.2002	0.2114	0.2232	0.2351	0.2478	0.2607	0.2737	0.2868	0.2998	0.3121	0.324	0.3359	0.3468	0.3579	0.3681	0.3786
14	0.0034	0.004	0.0048	0.0056	0.0064	0.0076	0.0096	0.0112	0.014	0.0171	0.0208	0.025	0.0299	0.0356	0.0418	0.0485	0.0556	0.0629	0.0708	0.0787	0.0869	0.0954	0.1034	0.1114	0.1194	0.1272	0.1347	0.1427	0.1513	0.1599	0.1687	0.1782	0.1883	0.1991	0.2104	0.222	0.234	0.2468	0.2597	0.2728	0.2859	0.299	0.3113	0.3234	0.3352	0.3462	0.3574	0.3676	0.3782
15	0.0048	0.0056	0.006	0.0068	0.0076	0.0089	0.0109	0.013	0.0154	0.019	0.0229	0.0272	0.0324	0.0379	0.0441	0.0509	0.0581	0.0654	0.0733	0.0815	0.0897	0.098	0.1058	0.1137	0.1216	0.1296	0.1369	0.1447	0.1532	0.1617	0.1705	0.18	0.19	0.2008	0.212	0.2236	0.2354	0.2481	0.2608	0.2739	0.2869	0.2998	0.312	0.3239	0.3356	0.3465	0.3576	0.3676	0.378
16	0.0046	0.0051	0.0056	0.0064	0.0071	0.0085	0.0104	0.0123	0.0147	0.0181	0.0215	0.0256	0.0307	0.036	0.0421	0.0486	0.0555	0.0627	0.0703	0.0784	0.0863	0.0945	0.1023	0.1102	0.118	0.1259	0.1332	0.141	0.1496	0.158	0.1668	0.176	0.1862	0.1969	0.2081	0.2197	0.2315	0.2443	0.257	0.2701	0.2833	0.2963	0.3085	0.3205	0.3322	0.3431	0.3543	0.3643	0.375
17	0.0049	0.0054	0.0057	0.0065	0.0073	0.0089	0.0109	0.0128	0.0152	0.0185	0.0221	0.026	0.0311	0.0364	0.0426	0.0492	0.0561	0.0632	0.0709	0.0789	0.0869	0.0949	0.1027	0.1107	0.1182	0.126	0.1332	0.1409	0.1492	0.158	0.1668	0.1763	0.1864	0.1971	0.2081	0.2196	0.2312	0.244	0.2567	0.2696	0.2828	0.2958	0.3079	0.3198	0.3317	0.3427	0.3539	0.3637	0.3743
18	0.0055	0.0059	0.0066	0.0073	0.0081	0.0096	0.0114	0.0134	0.016	0.0193	0.023	0.0272	0.032	0.0375	0.0439	0.0504	0.0575	0.0648	0.0724	0.0804	0.0884	0.0965	0.1045	0.1122	0.1201	0.1278	0.1354	0.143	0.1513	0.16	0.1687	0.1781	0.1883	0.1991	0.2102	0.2216	0.2334	0.2463	0.2588	0.2718	0.2849	0.298	0.3102	0.3221	0.3339	0.345	0.3561	0.366	0.3767
19	0.0043	0.0047	0.005	0.006	0.0069	0.0082	0.0097	0.0117	0.0142	0.0174	0.0209	0.0248	0.0296	0.0348	0.0405	0.0469	0.0533	0.0602	0.0674	0.0747	0.0823	0.09	0.0973	0.1046	0.1116	0.1191	0.1262	0.1334	0.1415	0.1494	0.1577	0.1667	0.1762	0.1863	0.1967	0.2074	0.2185	0.2304	0.2424	0.2545	0.2668	0.2788	0.29	0.3011	0.3122	0.3223	0.3325	0.3415	0.3514
20	0.0056	0.0062	0.0066	0.0074	0.0083	0.0098	0.0115	0.0135	0.016	0.0193	0.023	0.0273	0.0321	0.0374	0.0434	0.0498	0.0566	0.0636	0.0712	0.079	0.087	0.095	0.1024	0.1101	0.1178	0.1255	0.1328	0.1402	0.1487	0.157	0.1658	0.1752	0.1851	0.1958	0.2068	0.2181	0.2299	0.2425	0.2551	0.2681	0.281	0.2938	0.3057	0.3176	0.3294	0.3402	0.3512	0.3613	0.3719
21	0.0017	0.0026	0.003	0.0039	0.0052	0.0069	0.0085	0.0113	0.0142	0.0179	0.0228	0.0284	0.0349	0.0423	0.0505	0.0595	0.0693	0.0796	0.0901	0.1012	0.113	0.1239	0.1356	0.1462	0.1572	0.1676	0.1777	0.1884	0.1987	0.2091	0.2199	0.2309	0.2422	0.2536	0.2659	0.2782	0.291	0.3038	0.3178	0.3313	0.345	0.3579	0.371	0.3838	0.3961	0.4078	0.4195	0.4309	0.4423
22	0.0016	0.0022	0.0027	0.0038	0.0048	0.0065	0.008	0.0106	0.0135	0.0171	0.0219	0.0276	0.0338	0.0407	0.0487	0.0575	0.0674	0.0774	0.0878	0.0984	0.11	0.1206	0.1322	0.1427	0.1537	0.1641	0.1739	0.1844	0.1946	0.2048	0.2156	0.2269	0.2377	0.2492	0.2613	0.2735	0.2863	0.2992	0.3128	0.3264	0.34	0.3528	0.3657	0.3785	0.3907	0.4025	0.4142	0.4256	0.4369
23	0.002	0.0031	0.0036	0.0045	0.0056	0.0072	0.0088	0.0111	0.0139	0.0171	0.0217	0.027	0.0332	0.0399	0.0479	0.0566	0.0658	0.0757	0.086	0.0965	0.1079	0.1184	0.1295	0.1401	0.1509	0.1612	0.1711	0.1816	0.1917	0.2018	0.2125	0.2235	0.2347	0.246	0.258	0.2701	0.283	0.2958	0.3094	0.3227	0.3362	0.3491	0.362	0.3749	0.3871	0.3988	0.4107	0.4221	0.4334
24	0.0029	0.0038	0.0045	0.0051	0.0065	0.0079	0.0098	0.0125	0.0151	0.019	0.0238	0.0294	0.0356	0.0429	0.0511	0.0596	0.0694	0.0795	0.0901	0.1007	0.1121	0.1229	0.1342	0.1447	0.1556	0.1658	0.1756	0.186	0.1962	0.2064	0.2172	0.2281	0.2391	0.2506	0.2624	0.2748	0.2873	0.3002	0.3139	0.3272	0.3407	0.3535	0.3664	0.379	0.391	0.4028	0.4145	0.4259	0.4373
25	0.0028	0.0037	0.0043	0.0052	0.0063	0.0077	0.0094	0.0116	0.014	0.0175	0.0221	0.0273	0.033	0.0401	0.0476	0.056	0.0653	0.0752	0.0855	0.0959	0.1072	0.1175	0.1285	0.1389	0.1498	0.16	0.1698	0.18	0.1901	0.2002	0.2108	0.2218	0.2327	0.244	0.2559	0.2681	0.2808	0.2932	0.307	0.3203	0.3337	0.3465	0.3592	0.3718	0.384	0.3957	0.4073	0.4187	0.4298
26	0.0016	0.0024	0.0028	0.0038	0.0049	0.0067	0.0083	0.011	0.0138	0.0173	0.0222	0.0278	0.0344	0.0412	0.0494	0.0582	0.0675	0.0778	0.0881	0.0988	0.1104	0.1209	0.1323	0.1428	0.1536	0.1638	0.1736	0.1838	0.1941	0.2043	0.2149	0.2258	0.237	0.2482	0.2602	0.2724	0.285	0.2976	0.3114	0.3248	0.3382	0.3507	0.3635	0.3761	0.388	0.3998	0.4115	0.4227	0.434
27	0.001	0.0017	0.002	0.0028	0.004	0.006	0.0075	0.0101	0.0128	0.0164	0.0209	0.0264	0.0324	0.0396	0.0474	0.056	0.0654	0.0755	0.0855	0.096	0.1074	0.1179	0.1291	0.1395	0.1502	0.1605	0.1703	0.181	0.1911	0.2011	0.2117	0.2227	0.2338	0.2451	0.257	0.2693	0.282	0.2947	0.3084	0.3217	0.3351	0.3479	0.3607	0.3734	0.3855	0.3971	0.409	0.4203	0.4317
28	0.0031	0.0039	0.0044	0.0053	0.0066	0.0083	0.0098	0.0121	0.0149	0.0185	0.023	0.0282	0.0342	0.0415	0.049	0.0576	0.067	0.0769	0.0869	0.0975	0.1086	0.1192	0.1304	0.1407	0.1514	0.1617	0.1717	0.1818	0.1922	0.2023	0.2128	0.2238	0.2346	0.2461	0.2579	0.2703	0.2829	0.2953	0.309	0.3224	0.3359	0.3486	0.3614	0.3742	0.3863	0.398	0.4098	0.4212	0.4325
29	0.001	0.0018	0.0022	0.0032	0.0044	0.0062	0.0077	0.0104	0.0133	0.0167	0.0216	0.0271	0.0335	0.0403	0.0482	0.0569	0.0666	0.0766	0.0866	0.0974	0.1084	0.1192	0.1301	0.1406	0.1512	0.1613	0.1713	0.1816	0.1918	0.2018	0.2125	0.2234	0.2344	0.2457	0.2575	0.2697	0.2822	0.2947	0.3084	0.3217	0.3351	0.3476	0.3604	0.3731	0.3852	0.397	0.4087	0.4199	0.4312
30	0.0002	0.0008	0.0015	0.0024	0.0036	0.0052	0.007	0.0095	0.0125	0.0161	0.0205	0.026	0.0324	0.039	0.0473	0.0558	0.0653	0.0751	0.0852	0.0956	0.107	0.1172	0.1284	0.1389	0.1494	0.1597	0.1695	0.18	0.1899	0.2	0.2105	0.2216	0.2324	0.2435	0.2554	0.2675	0.28	0.2926	0.3062	0.3193	0.3327	0.3453	0.358	0.3707	0.3825	0.3941	0.4057	0.417	0.4282
31	0.0005	0.0011	0.0017	0.0027	0.004	0.0057	0.0074	0.0099	0.0127	0.0163	0.0209	0.0265	0.0326	0.0395	0.0473	0.0559	0.0654	0.0752	0.0853	0.0959	0.1072	0.1175	0.1287	0.1391	0.1497	0.1598	0.1698	0.1799	0.19	0.2003	0.2107	0.2218	0.2325	0.2439	0.2556	0.2677	0.2802	0.2927	0.3065	0.3198	0.3329	0.3457	0.3582	0.371	0.3829	0.3946	0.4063	0.4174	0.4289
32	0.0005	0.0014	0.002	0.0028	0.0037	0.0055	0.0071	0.0095	0.0124	0.0157	0.0203	0.0254	0.0315	0.0385	0.046	0.0542	0.0637	0.0736	0.0837	0.0941	0.1051	0.1153	0.1265	0.1367	0.1474	0.1576	0.1674	0.1775	0.1878	0.1978	0.2084	0.2192	0.2303	0.2415	0.2532	0.2656	0.2781	0.2906	0.3044	0.3176	0.331	0.3436	0.3564	0.3691	0.381	0.3927	0.4044	0.4157	0.4271
33	-0.0001	0.0007	0.0012	0.0022	0.0034	0.0049	0.0065	0.0089	0.0114	0.0148	0.0193	0.0244	0.0307	0.0374	0.0448	0.0531	0.0624	0.0719	0.0817	0.0924	0.1035	0.1136	0.1244	0.1349	0.1451	0.1553	0.1651	0.1755	0.1855	0.1955	0.2059	0.2168	0.2277	0.239	0.2506	0.2628	0.2753	0.2879	0.3013	0.3147	0.3279	0.3405	0.3532	0.3659	0.3779	0.3896	0.4011	0.4123	0.4236
34	0.0007	0.0013	0.0019	0.003	0.004	0.0057	0.0075	0.0099	0.0128	0.0162	0.021	0.0263	0.0324	0.0395	0.047	0.0555	0.0645	0.0743	0.0846	0.0951	0.1061	0.1165	0.1275	0.1378	0.1485	0.1585	0.1683	0.1783	0.1885	0.1986	0.2089	0.2199	0.2306	0.242	0.2537	0.2659	0.2785	0.2908	0.3044	0.3176	0.3308	0.3433	0.356	0.3685	0.3806	0.3922	0.4039	0.4151	0.4263
35	0.0012	0.0022	0.0025	0.0035	0.0045	0.0062	0.0076	0.0101	0.0127	0.0162	0.0203	0.0255	0.0312	0.0383	0.0454	0.0538	0.0628	0.0726	0.0823	0.0926	0.1036	0.1139	0.1248	0.1351	0.1458	0.1558	0.1656	0.1758	0.1859	0.1955	0.2061	0.2169	0.2277	0.2389	0.2506	0.2627	0.2751	0.2875	0.301	0.3141	0.3274	0.3399	0.3525	0.3652	0.3771	0.3886	0.4002	0.4114	0.4228
36	0.0008	0.0017	0.0023	0.0031	0.0042	0.0056	0.0072	0.0095	0.012	0.0154	0.0194	0.0245	0.0305	0.0369	0.0445	0.0527	0.0614	0.0709	0.081	0.0912	0.1024	0.1124	0.1233	0.1337	0.1439	0.1542	0.1641	0.1744	0.1846	0.1945	0.2049	0.2158	0.2267	0.2379	0.2497	0.262	0.2742	0.2867	0.3005	0.3138	0.327	0.3397	0.3524	0.365	0.3773	0.3889	0.4006	0.4118	0.4231
37	0.0008	0.0016	0.002	0.0028	0.0041	0.0057	0.0072	0.0098	0.0125	0.0158	0.0202	0.0254	0.0317	0.038	0.0458	0.0537	0.063	0.0726	0.0824	0.0927	0.1036	0.1137	0.1244	0.1344	0.1451	0.1551	0.1646	0.1746	0.1847	0.1942	0.2046	0.2154	0.226	0.2372	0.2488	0.2607	0.2731	0.2852	0.2986	0.3114	0.3244	0.3369	0.3492	0.3616	0.3734	0.3848	0.3962	0.4072	0.4182
38	0.0001	0.0008	0.0012	0.0022	0.0033	0.0052	0.0067	0.0093	0.0121	0.0158	0.0204	0.0257	0.032	0.0388	0.0468	0.0551	0.0642	0.0742	0.0841	0.0947	0.1057	0.1162	0.127	0.1374	0.1481	0.1583	0.168	0.1783	0.1882	0.1983	0.2089	0.2198	0.2305	0.2417	0.2536	0.2656	0.278	0.2905	0.3042	0.3173	0.3304	0.3429	0.3556	0.3683	0.3804	0.3919	0.4033	0.4147	0.4259
39	-0.0005	0.0004	0.0011	0.0019	0.003	0.0046	0.0063	0.0088	0.0116	0.0151	0.0198	0.0251	0.0315	0.0382	0.0458	0.0543	0.0636	0.0732	0.0832	0.0937	0.1047	0.1148	0.1259	0.136	0.1465	0.1565	0.1665	0.1765	0.1866	0.1966	0.2067	0.2178	0.2286	0.2397	0.2514	0.2635	0.2757	0.288	0.3014	0.3146	0.3277	0.3401	0.3526	0.3651	0.377	0.3885	0.3999	0.4109	0.4222
40	-0.0003	0.0006	0.0012	0.002	0.0034	0.0049	0.0066	0.0091	0.0119	0.0156	0.0202	0.0257	0.0316	0.0387	0.0461	0.0546	0.0639	0.0738	0.0838	0.0941	0.1053	0.1157	0.1269	0.1369	0.1478	0.1579	0.1676	0.1778	0.1879	0.1979	0.2083	0.2192	0.2301	0.2415	0.253	0.2653	0.2777	0.29	0.3033	0.3165	0.3297	0.3424	0.355	0.3675	0.3795	0.391	0.4026	0.4137	0.4249
41	-0.0007	0	0.0006	0.0016	0.0026	0.0043	0.0059	0.0084	0.0111	0.015	0.0195	0.0249	0.0308	0.0378	0.0455	0.0538	0.0632	0.0732	0.0831	0.0935	0.1045	0.115	0.1258	0.1362	0.1467	0.1569	0.1667	0.1768	0.187	0.197	0.2072	0.2182	0.229	0.2403	0.2522	0.2641	0.2764	0.2889	0.3023	0.3154	0.3286	0.341	0.3538	0.3663	0.378	0.3894	0.401	0.4123	0.4236
[truncated: 486 more columns]
